# Supplementary material for: Anti-VEGF therapy improves EGFR-vIII-CAR-T cell delivery and efficacy in syngeneic glioblastoma models in mice
Source: PubMed Central journal article supplement — J Immunother Cancer. 2023 Mar 10;11(3):e005583. doi: 10.1136/jitc-2022-005583 (PMC10008211; doi:10.1136/jitc-2022-005583), 2023-03-10
Supplement: jitc-2022-005583supp001.pdf [file jitc-2022-005583supp001.pdf]

**SHORT REPORT:****Title: Anti-VEGF therapy improves EGFR-vIII-CAR-T cell delivery and efficacy in syngeneic glioblastoma models in mice**

**Authors:** Xinyue Dong<sup>1,a</sup>, Jun Ren<sup>1,b</sup>, Zohreh Amoozgar<sup>1,c</sup>, Somin Lee<sup>1</sup>, Meenal Datta<sup>1,d</sup>, Sylvie Roberge<sup>1</sup>, Mark Duquette<sup>1</sup>, Dai Fukumura<sup>1</sup> and Rakesh K. Jain<sup>1</sup>.

**Affiliations:**

1. Edwin L. Steele Laboratories for Tumor Biology, Department of Radiation Oncology, Massachusetts General Hospital and Harvard Medical School, Boston, MA 02114
  - a. Current affiliation: Takeda Pharmaceutical Company Limited, Cambridge, MA 02139
  - b. Current affiliation: Dynamic Cell Therapies, Inc., Boston, MA 02134
  - c. Current affiliation: Sanofi, 270 Albany St., Cambridge, MA 02139
  - d. Current affiliation: Department of Aerospace and Mechanical Engineering, University of Notre Dame, Notre Dame, IN 46556

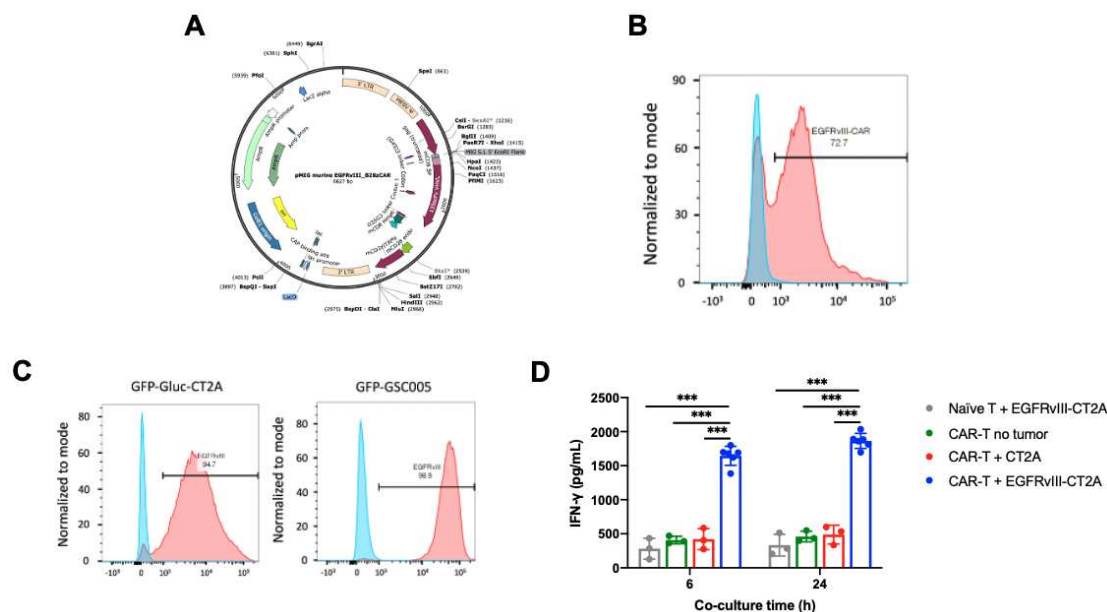

**Figure S1. Generation of murine EGFRvIII-CAR-T cells and EGFRvIII-expressing syngeneic GBM cell lines.** (A) Genetic maps of retroviral vectors encoding EGFRvIII targeting CAR. (B) Mouse T cells were transduced with retroviral constructs, and transduction efficiency was determined by assessing the Myc-tag on CAR-T cells 3 days post-transduction by flow cytometry. (C) Transduction efficiency of EGFRvIII in GBM tumor cells was determined by assessing the EGFRvIII expression on CAR-T cells 3 days post-transduction by flow cytometry. (D) CAR-T cells were incubated at a ratio of 1:1 with CT2A GBM cells, and IFN- $\gamma$  release after 6 and 24-hr co-culture was measured by ELISA ( $n = 3$ ). Error bars show  $\pm$  SEM. Statistical analysis was performed using one-way ANOVAs. \*\*\* $p < 0.001$ .

#### Correlation of Gluc Samples vs Ultrasound Volume Measurements

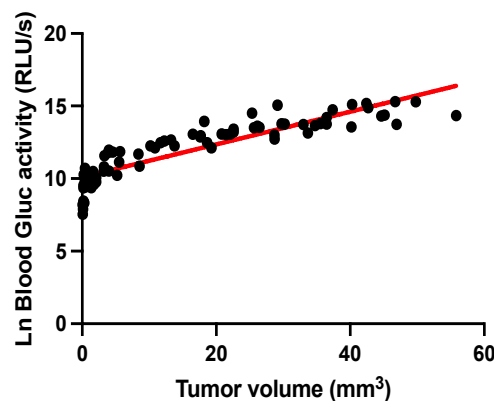

**Figure S1. EGFRvIII-GFP-CT2A-Gluc activity in blood (RLU/s) versus tumor volume in cubic millimeters as measured by in vivo micro ultrasound. Ln, natural logarithm.  $R^2 = 0.78$**

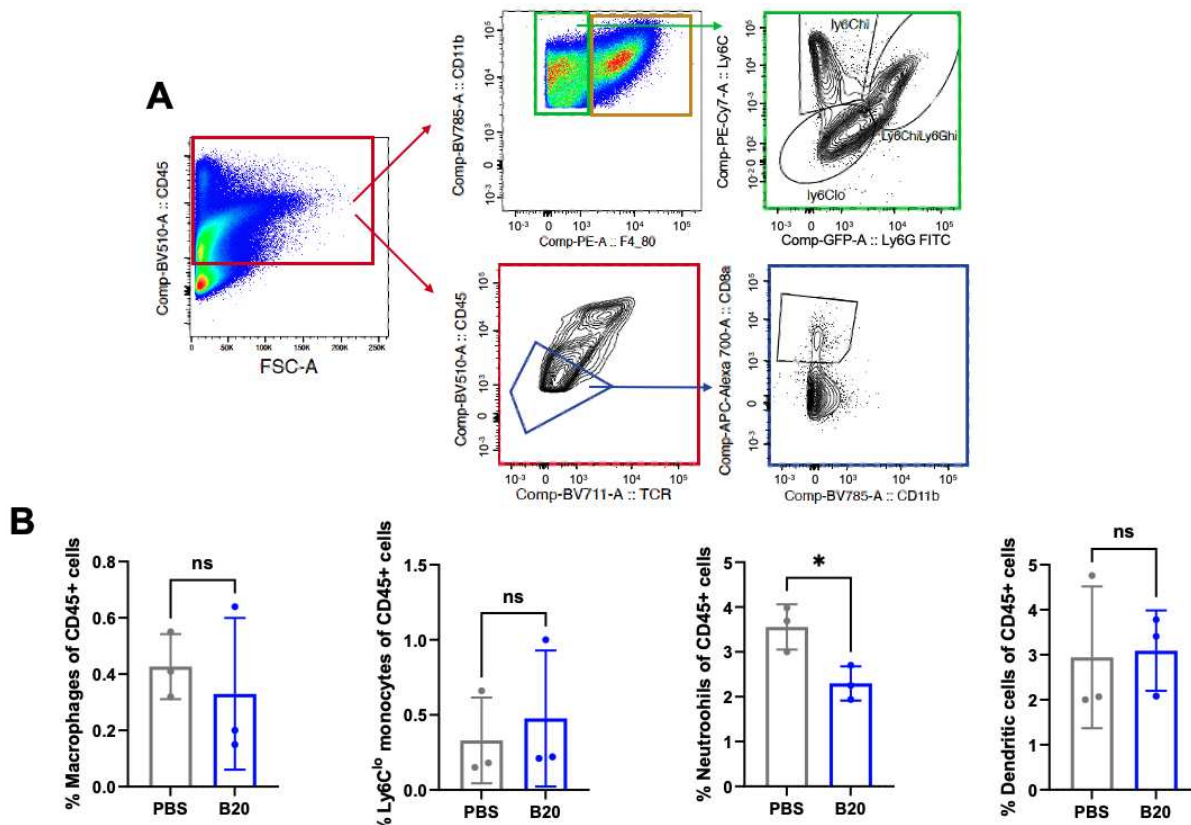

**Figure S2. The effect of B20 treatment on the macrophages, neutrophils, or dendritic cells in GSC005 tumors as compared with PBS control.** (A) Gating strategy of CD45+/CD11b+/F4/80+/GR1- macrophages, Ly6C<sup>lo</sup> monocytes and Ly6G+ neutrophils (gated on CD45+/CD11b+/F4/80-), and CD45+/TCR-/CD8a+ dendritic cells inside the GSC005 GBM tumors. (B) Percentage of macrophages, Ly6C<sup>lo</sup> monocytes and Ly6G+ neutrophils and dendritic cells inside the GSC005 GBM tumors. Error bars show  $\pm$  SEM. Statistical analysis was performed using Student's t-test.

**Supplemental Movie SM1. Real-time multi-photon 3D video of live mouse brain treated with PBS (Video 1).** GSC005 tumors were GFP labeled (green), and CAR-T cells were fluorescently labeled (red). Scale bar=50  $\mu$ m.

**Supplemental Movie SM2. Real-time multi-photon 3D video of live mouse brain treated with EGFR<sup>vIII</sup>-CAR-T cells (Video 2).** GSC005 tumors were GFP labeled (green), and CAR-T cells were fluorescently labeled (red). Scale bar=50  $\mu$ m.
